# Supplementary material
Source: publisher figshare collection journal article supplement (https://frontiersin.figshare.com/ndownloader/files/28286310)
Supplement: Supplementary file 1 [file 28286310]

## Sheet: Sheet1
Species	Synonym	Type Locality	Other locaties	Depth Range	Habitat
Sirsoe grasslei (Blake, 1985)	Orseis grasslei Blake ,1985	Guaymas basin	-	2010-2030	Vent
Sirsoe hessleri (Blake, 1991)	Hesiocaeca hessleri Blake, 1991	Mariana Back-Arc basin	-	3640	Vent
Sirsoe methanicola (Desbruyères & Toulmond, 1998)	Hesiocaeca methanicola Desbruyères & Toulmond, 1998	Gulf of Mexico	-	538	Methane Hydrates
Sirsoe balaenophila (Pleijel, Rouse, Ruta, Wiklund & Nygren, 2008)	Vrijenhoekia balaenophila Pleijel, Rouse, Ruta, Wiklund & Nygren, 2008	Monterey Canyon	SW Atlantic	1444-3328	Whale fall
Sirsoe sirikos Summers, Pleijel & Rouse, 2015	-	Monterey Canyon	SW Atlantic	2893	Whale fall
Sirsoe ketea (Summers, Pleijel & Rouse, 2015)	Vrijenhoekia ketea Summers, Pleijel & Rouse, 2015	Monterey Canyon	-	2893	Whale fall
Sirsoe ahabi (Summers, Pleijel & Rouse, 2015)	Vrijenhoekia ahabi Summers, Pleijel & Rouse, 2015	Monterey Canyon	-	2893	Whale fall
Sirsoe falenothiras (Summers, Pleijel & Rouse, 2015)	Vrijenhoekia falaenothiras Summers, Pleijel & Rouse, 2015	Monterey Canyon	-	2893	Whale fall
Sirsoe dalailamai Rouse, Carvajal & Pleijel, 2018	-	Costa Rica Margin	Guaymas Basin	997-1886	Whale fall, Seep
Sirsoe munki Rouse, Carvajal & Pleijel, 2018	-	Costa Rica Margin	-	1800-1866	Seep
Sirsoe alphacrucis sp.nov.	-	Santos Basin, SW Atlantic	-	550-1444	Whale fall
Sirsoe alphadelphini sp. nov.	-	Campos Basin, SW Atlantic	-	1444-3227	Whale fall
Sirsoe alucia sp. nov.	-	Santos Basin, SW Atlantic	-	550	Whale fall
Sirsoe besnard sp. nov.	-	Campos Basin, SW Atlantic	-	3227	Whale fall
Sirsoe maximiano sp. nov.	-	Santos Basin, SW Atlantic	Caribbean Sea	1439-3328	Whale fall, Vent
Sirsoe nadir sp. nov.	-	Santos Basin, SW Atlantic	-	550	Whale fall
Sirsoe pirapuan sp. nov.	-	Espírito Santos Basin, SW Atlantic	-	1444-3211	Whale fall
Sirsoe ungava sp. nov.	-	Espírito Santos Basin, SW Atlantic	-	1444-3328	Whale fall
Sirsoe yokosuka sp. nov.	-	Campos Basin, SW Atlantic	-	3211-4204	Whale fall
Sirsoe ypupiara sp. nov.	-	Campos Basin, SW Atlantic	-	3227-3328	Whale fall
